# Supplementary material for: Porous carbon-based metal-free monolayers towards highly stable and flexible wearable thermoelectrics and microelectronics
Source: Royal Society of Chemistry journal article supplement (doi:10.1039/d2nr05443d), 2022-12-14
Supplement: d2nr05443d1.pdf [file d2nr05443d1.pdf]

## Supporting Information

### Porous carbon-based metal-free monolayers towards to high stable and flexible wearable thermoelectric and microelectronics

Xiaoran Shi<sup>1</sup>, Hongsheng Liu<sup>1</sup>, Ziyu Hu<sup>2\*</sup>, Jijun Zhao<sup>1,3</sup>, Junfeng Gao<sup>1,3\*</sup>

<sup>1</sup>Key Laboratory of Materials Modification by Laser, Ion and Electron Beams  
(Dalian University of Technology), Ministry of Education, Dalian 116024, China

<sup>2</sup>College of Mathematics and Physics, Beijing University of Chemical Technology,  
Beijing 100029, People's Republic of China

<sup>3</sup>State Key Laboratory of Structural Analysis for Industrial Equipment, Dalian  
University of Technology, Dalian, 116024, China

Corresponding authors: [gaojf@dlut.edu.cn](mailto:gaojf@dlut.edu.cn) and [huziyu@mail.buct.edu.cn](mailto:huziyu@mail.buct.edu.cn)

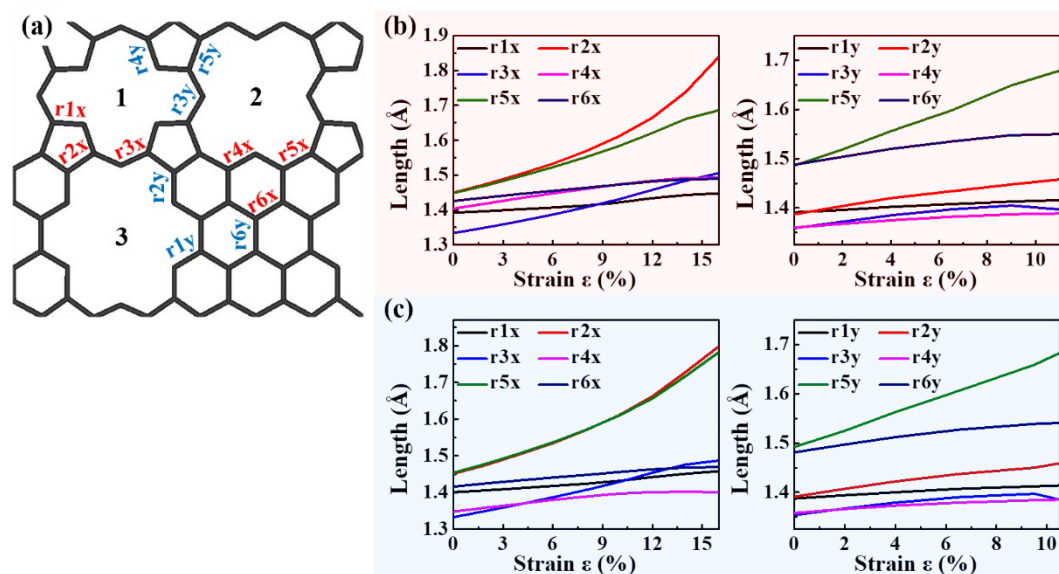

**Fig. S1** (a) Schematic illustrations of the bonds of g-MC-A and g-MC-B. Strain-length curves for (b) g-MC-A and (c) g-MC-B along x/y direction.

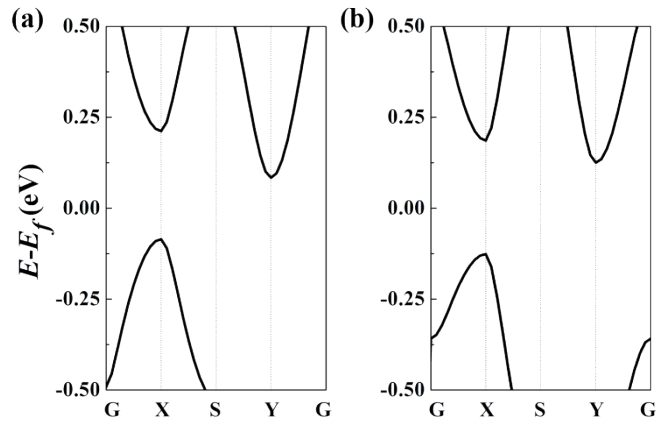

**Fig. S2.** Band structures of (a) g-MC-A and (b) g-MC-B on the HSE06 level, the fermi level is shifted to zero.

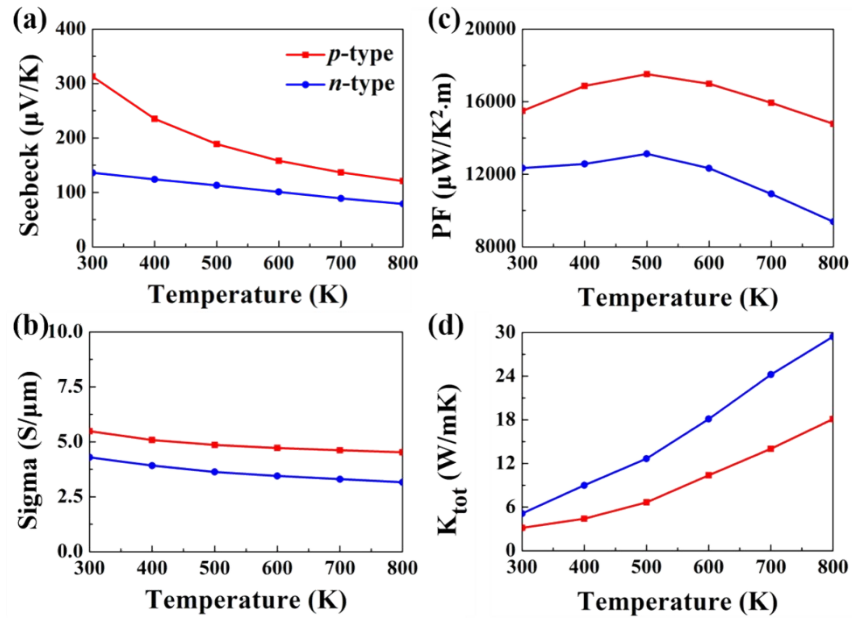

**Fig. S3** Thermoelectric parameters of g-MC-A. (a) Seebeck coefficient. (b) Conductivity. (c) Power factor. (d) Thermal conductivity.

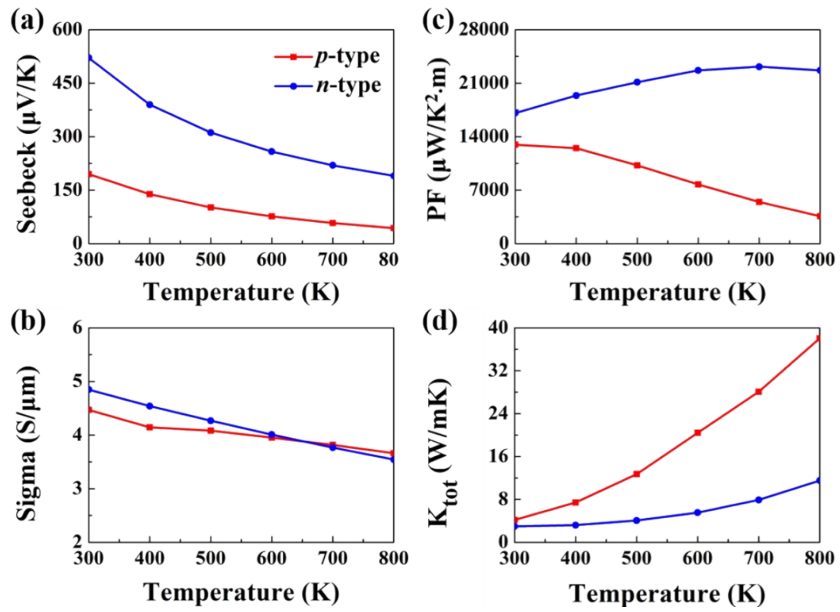

**Fig. S4** Thermoelectric parameters of g-MC-B. (a) Seebeck coefficient. (b) Conductivity. (c) Power factor. (d) Thermal conductivity.

**Table S1** 2D elastic modulus, effective masses, deformation potential and carrier mobilities. The orientations of x and y are defined in Fig. 1.

| Material | Carrier    | $C_{2D}$ (N/m) | $m^*$ ( $m_0$ ) | $E_1$ (eV) | $\mu$ ( $10^3\text{cm}^2\text{V}^{-1}\text{s}^{-1}$ ) |
|----------|------------|----------------|-----------------|------------|-------------------------------------------------------|
| g-MC-A   | electron-x | 155            | 0.23            | 1.58       | 25.7                                                  |
|          | electron-y | 153            | 0.20            | 4.77       | 3.9                                                   |
|          | hole-x     | 155            | 0.07            | 3.34       | 49.2                                                  |
|          | hole-y     | 153            | 0.48            | 3.07       | 1.6                                                   |
| g-MC-B   | electron-x | 154            | 0.32            | 1.67       | 11.4                                                  |
|          | electron-y | 155            | 0.16            | 5.13       | 5.0                                                   |
|          | hole-x     | 154            | 0.25            | 3.28       | 5.0                                                   |
|          | hole-y     | 155            | 0.33            | 3.35       | 2.8                                                   |

**Table S2** The relaxation time  $\tau$  for g-MC.

| Material | Carrier    | $\tau$ (ps) |
|----------|------------|-------------|
| g-MC-A   | electron-x | 3.36        |
|          | electron-y | 0.43        |
|          | hole-x     | 1.96        |
|          | hole-y     | 0.44        |
| g-MC-B   | electron-x | 2.07        |
|          | electron-y | 0.45        |
|          | hole-x     | 0.71        |
|          | hole-y     | 0.53        |
